# Supplementary material for: Effectiveness of Teacher-Led Nutritional Lessons in Altering Dietary Habits and Nutritional Status in Preschool Children: Adoption of a NASA Mission X-Based Program
Source: PubMed Central journal article supplement (PMC6682966; doi:10.3390/nu11071590), 2019-07-13
Supplement: nutrients-11-01590-s001.pdf [file nutrients-11-01590-s001.pdf]

**Table S1. Nutrition theme-based Mission X program for South Korean preschoolers**

| week | Nutrition theme                 | Goals                                                                                                                                                                                                                                          | Activity                                                                                                                                                                                                                                                                               |
|------|---------------------------------|------------------------------------------------------------------------------------------------------------------------------------------------------------------------------------------------------------------------------------------------|----------------------------------------------------------------------------------------------------------------------------------------------------------------------------------------------------------------------------------------------------------------------------------------|
| 1-2  | Energy of an astronaut          | <ul style="list-style-type: none"> <li>- Knowing balanced meal based on five food groups</li> <li>- Understanding specific nutritional needs</li> </ul>                                                                                        | <ul style="list-style-type: none"> <li>- Categorizing different food items by five food groups</li> <li>- Pairing food items by five food groups*</li> </ul>                                                                                                                           |
| 3-6  | Hydration Station <sup>1)</sup> | <ul style="list-style-type: none"> <li>- Understanding important roles of water to keep our body healthy</li> <li>- Identifying signs of dehydration</li> <li>- Learning relationship of the body system &amp; organs and hydration</li> </ul> | <ul style="list-style-type: none"> <li>- Think and tell the signs of dehydration and important roles of water in human body</li> <li>- Comparing dried vs. fresh fruits and their peel*</li> <li>- Hydrate the astronaut game*</li> <li>- Observing simulated urine sample*</li> </ul> |
| 7    | Living Bones, Strong Bones      | <ul style="list-style-type: none"> <li>- Recognizing calcium rich foods</li> </ul>                                                                                                                                                             | <ul style="list-style-type: none"> <li>- Comparing different bone shape and structure</li> </ul>                                                                                                                                                                                       |
| 8    | Reduced gravity, Low-fat        | <ul style="list-style-type: none"> <li>- Formulating healthy food</li> </ul>                                                                                                                                                                   | <ul style="list-style-type: none"> <li>- Discovering fat &amp; sugar contents</li> </ul>                                                                                                                                                                                               |
| 9-10 | Class review and practice       | <ul style="list-style-type: none"> <li>- Review the nutritional messages</li> </ul>                                                                                                                                                            | <ul style="list-style-type: none"> <li>- Teacher-led class activities based on nutrition theme</li> </ul>                                                                                                                                                                              |

<sup>1)</sup> Hydration Station: this theme was connected to seasonal events activities (swimming pool or outdoor activities with water) in their ECES

\* Based on the nutrition theme, 2, 4-6 and 9-10 week of games and science related classes were delivered by class teachers
